# Supplementary material for: Structural and Luminescence Properties of Eu-Doped PMO Films with Ethylene Bridge and Methyl Terminal Groups
Source: Preprints.org preprint supplement (doi:10.20944/preprints202307.2068.v1), 2023-07-31
Supplement: Supplementary file 1 [file supplementary]

# Structural and Luminescence Properties of Eu-Doped PMO Films with Ethylene Bridge and Methyl Terminal Groups

Md Rasadujjaman <sup>1,2,\*</sup>, Jinming Zhang <sup>1</sup>, Alexey S. Vishnevskiy <sup>3</sup>, Jing Zhang <sup>1,\*</sup>, and Mikhail R. Baklanov <sup>1,3,4</sup>

<sup>1</sup> Department of Microelectronics, North China University of Technology, Beijing 100144, China; jinming@naura.com (J.Z.); baklanovmr@gmail.com (M.R.B.)

<sup>2</sup> Department of Physics, Mawlana Bhashani Science and Technology University, Santosh, Tangail 1902, Bangladesh; rasadphy@mbstu.ac.bd (M.R.)

<sup>3</sup> Research and Education Center “Technological Center”, MIREA—Russian Technological University (RTU MIREA), Moscow 119454, Russia; alexeysw@mail.ru (A.S.V.)

<sup>4</sup> Research European Centre for Knowledge and Technology Transfer (EUROTEx), Brussels 1040, Belgium

\* Correspondence: rasadphy@mbstu.ac.bd (M.R.); zhangj@ncut.edu.cn (J.Z.)

## Estimations of atomic concentration of Eu (at% of Eu):

In this work, the ratio of 1,2-bis(trimethoxysilyl)ethane (BTMSE, 96%, Sigma-Aldrich) and methyltrimethoxysilane (MTMS, 98%, Fluka) was 47/53. The amount of BTMSE was 1.07 gm and MTMS was 0.60158 gm.

The amount of 25.8 wt%  $\text{Eu}(\text{NO}_3)_3 \cdot 6\text{H}_2\text{O}$  in solution:

$$= (\text{Quantity of BTMSE} + \text{Quantity of MTMS}) \times 25.8\%$$

$$= (1.07 \text{ g} + 0.60158 \text{ g}) \times 0.258$$

$$= 0.431267 \text{ g}$$

$$= 0.431267 \text{ g} \times 99.99\% (\text{purity})$$

$$= 0.43122 \text{ g of } \text{Eu}(\text{NO}_3)_3 \cdot 6\text{H}_2\text{O}$$

Then the atomic percent of Eu (at% of Eu),

$$= \frac{\text{atomic mass of Eu} \times \text{amount of 25.8 wt\% } \text{Eu}(\text{NO}_3)_3 \cdot 6\text{H}_2\text{O} \times 100}{\text{Atomic mass of 25.8 wt\% } \text{Eu}(\text{NO}_3)_3}$$

$$= \frac{151.964 \times 0.43122 \times 100}{446.07} = 14.69 \text{ at\% of Eu}$$

Similarly,

The atomic percent at% of Eu for 1.7 wt%  $\text{Eu}(\text{NO}_3)_3 \cdot 6\text{H}_2\text{O}$  = 0.97 at% of Eu

The atomic percent at% of Eu for 12.1 wt%  $\text{Eu}(\text{NO}_3)_3 \cdot 6\text{H}_2\text{O}$  = 6.89 at% of Eu
